# Supplementary material for: Meta-Analysis of Dyslipidemia and Blood Lipid Parameters on the Risk of Primary Open-Angle Glaucoma
Source: Comput Math Methods Med. 2022 Sep 21;2022:1122994. doi: 10.1155/2022/1122994 (PMC9519322; doi:10.1155/2022/1122994)
Supplement: Supplementary Materials — This section provides additional information about the funnel chart for reporting the relationship between dyslipidemia and the risk of POAG (Supplementary Figure S1). [file 1122994.f1.zip]

Archive with 2 entries (2 files):
- editable Supplementary Figure S1.pdf
- Supplementary Figure S1 (1).docx
