# Supplementary figures and images for: Meta-Analysis of Dyslipidemia and Blood Lipid Parameters on the Risk of Primary Open-Angle Glaucoma
Source: Hindawi journal article supplement (doi:10.1155/2022/1122994), 2022-09-21

Funnel plot with subgroups

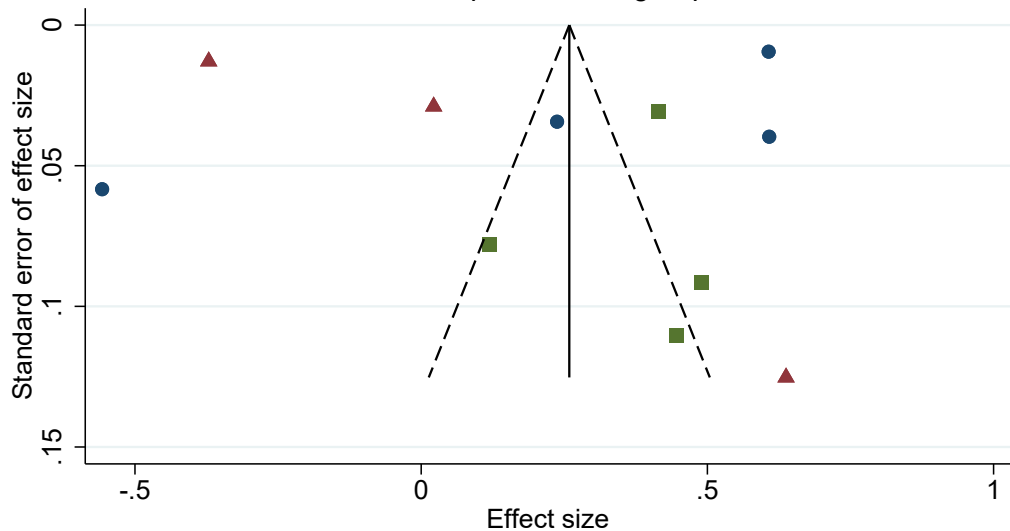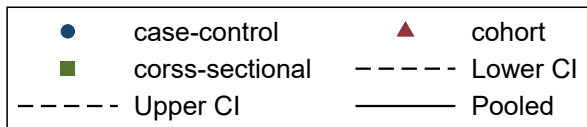

Supplement: f1 [file 1122994.f1.zip]
